# Supplementary material for: Post-Chemoradiation Lymphopenia and Baseline Eosinophil Counts as Prognostic Markers in Glioblastoma
Source: Research Square preprint supplement (doi:10.21203/rs.3.rs-7715242/v1), 2025-10-12
Supplement: Supplementary file 1 [file 4415d0e5000864ce9fed91b7.docx]

**Post-Chemoradiation Lymphopenia and Baseline Eosinophil Counts as Prognostic Markers in Glioblastoma**

**Supplemental Tables**

**Table S1.** Univariate Cox regression analysis for overall survival: comprehensive analysis including all hematologic and clinical factors.

| ***Window*** | ***Variable*** | ***HR*** | ***95% CI Low*** | ***95% CI High*** | ***p*** |
| --- | --- | --- | --- | --- | --- |
| Baseline (Pre-Rx) | Abs eosinophils | 0.71 | 0.53 | 0.95 | 0.022 |
| Baseline (Pre-Rx) | Abs lymphocytes | 0.78 | 0.60 | 1.02 | 0.073 |
| Baseline (Pre-Rx) | NLR | 1.14 | 0.93 | 1.40 | 0.221 |
| Baseline (Pre-Rx) | Abs basophils | 1.01 | 0.79 | 1.29 | 0.96 |
| Baseline (Pre-Rx) | Abs platelets | 0.81 | 0.60 | 1.08 | 0.148 |
| Baseline (Pre-Rx) | Abs Monocytes | 0.97 | 0.76 | 1.23 | 0.812 |
| Baseline (Pre-Rx) | Abs RBC | 1.07 | 0.88 | 1.30 | 0.508 |
| Baseline (Pre-Rx) | ALC <0.75 (binary) | 2.41 | 0.87 | 6.69 | 0.092 |
| Post-Rx | Abs eosinophils | 0.69 | 0.43 | 1.10 | 0.121 |
| Post-Rx | WBC | 1.19 | 0.93 | 1.52 | 0.166 |
| Post-Rx | RBC | 0.90 | 0.72 | 1.14 | 0.39 |
| Post-Rx | NLR | 1.09 | 0.89 | 1.32 | 0.398 |
| Post-Rx | Abs lymphocytes | 1.09 | 0.87 | 1.37 | 0.442 |
| Post-Rx | Abs Monocytes | 0.92 | 0.72 | 1.18 | 0.512 |
| Post-Rx | Abs basophils | 1.07 | 0.80 | 1.44 | 0.645 |
| Post-Rx | Abs Platelets | 0.95 | 0.76 | 1.20 | 0.69 |
| Post-Rx | ALC <0.75 (binary) | 0.77 | 0.48 | 1.23 | 0.268 |
| 1-Month Post-Rx | Abs eosinophils | 0.44 | 0.20 | 0.99 | 0.046 |
| 1-Month Post-Rx | NLR | 1.42 | 0.92 | 2.17 | 0.112 |
| 1-Month Post-Rx | Abs Platelets | 0.93 | 0.69 | 1.26 | 0.646 |
| 1-Month Post-Rx | Abs basophils | 1.06 | 0.68 | 1.64 | 0.8 |
| 1-Month Post-Rx | Abs RBC | 0.98 | 0.76 | 1.26 | 0.87 |
| 1-Month Post-Rx | Abs lymphocytes | 1.02 | 0.78 | 1.34 | 0.872 |
| 1-Month Post-Rx | Abs Monocytes | 0.98 | 0.76 | 1.27 | 0.891 |
| 1-Month Post-Rx | ALC <0.75 (binary) | 1.02 | 0.60 | 1.74 | 0.941 |
| 1-Month Post-Rx | Abs WBC | 1.21 | 0.88 | 1.67 | 0.235 |
| 2-Month Post-Rx | Abs eosinophils | 0.57 | 0.36 | 0.90 | 0.016 |
| 2-Month Post-Rx | NLR | 1.58 | 1.12 | 2.23 | 0.009 |
| 2-Month Post-Rx | Abs WBC | 1.35 | 0.98 | 1.84 | 0.064 |
| 2-Month Post-Rx | Abs basophils | 0.84 | 0.64 | 1.10 | 0.192 |
| 2-Month Post-Rx | Abs Monocytes | 1.07 | 0.83 | 1.39 | 0.586 |
| 2-Month Post-Rx | Abs RBC | 1.04 | 0.79 | 1.38 | 0.761 |
| 2-Month Post-Rx | Abs Platelets | 0.97 | 0.73 | 1.28 | 0.804 |
| 2-Month Post-Rx | Abs lymphocytes | 0.99 | 0.75 | 1.31 | 0.941 |
| 2-Month Post-Rx | ALC <0.75 (binary) | 0.88 | 0.51 | 1.51 | 0.637 |
| 3-Month Post-Rx | Abs eosinophils | 0.65 | 0.35 | 1.18 | 0.157 |
| 3-Month Post-Rx | Abs lymphocytes | 0.81 | 0.58 | 1.12 | 0.207 |
| 3-Month Post-Rx | Abs WBC | 0.87 | 0.64 | 1.18 | 0.362 |
| 3-Month Post-Rx | Abs Monocytes | 0.89 | 0.67 | 1.20 | 0.455 |
| 3-Month Post-Rx | NLR | 0.92 | 0.68 | 1.23 | 0.558 |
| 3-Month Post-Rx | Abs basophils | 0.97 | 0.73 | 1.29 | 0.827 |
| 3-Month Post-Rx | Abs RB | 0.98 | 0.76 | 1.26 | 0.859 |
| 3-Month Post-Rx | Abs Platelets | 0.98 | 0.72 | 1.32 | 0.883 |
| 3-Month Post-Rx | ALC <0.75 (binary) | 1.93 | 1.02 | 3.66 | 0.044 |
| Clinical | Subtotal Resection vs GTR | 1.99 | 1.19 | 3.32 | 0.009 |
| Clinical | Biopsy vs GTR | 4.17 | 1.55 | 11.22 | 0.005 |
| Clinical | Total steroid days | 1.01 | 1.00 | 1.01 | 0.021 |
| Clinical | Steroids <60 days | 0.58 | 0.36 | 0.93 | 0.023 |
| Clinical | Brain V60 | 1.32 | 1.03 | 1.69 | 0.026 |
| Clinical | IDH | 2.92 | 1.06 | 8.09 | 0.039 |
| Clinical | PTV 6000 (per 10 cm3) | 1.02 | 1.00 | 1.03 | 0.043 |
| Clinical | MGMT status | 0.57 | 0.33 | 0.99 | 0.045 |
| Clinical | RT duration (days) | 1.12 | 1.00 | 1.25 | 0.046 |
| Clinical | Age (years) | 1.01 | 1.00 | 1.03 | 0.164 |
| Clinical | KPS (continuous) | 0.99 | 0.97 | 1.01 | 0.363 |
| Clinical | FLAIR volume (per 10 cm3) | 1.01 | 0.98 | 1.03 | 0.583 |
| Clinical | Gender (Female vs Male) | 0.93 | 0.58 | 1.51 | 0.778 |

Entries are hazard ratios (HR) with 95% CI; HR > 1 indicates higher hazard (worse survival). ALC (3-mo) dichotomized at 0.75 × 10³/µL; AEC and other continuous hematologic indices are reported per standard deviation (SD) at the specified time point (baseline AEC SD = 0.106 × 10³/µL). p values from two-sided Wald tests. Time windows: baseline (pre-CRT), post-CRT (within 2 weeks), and 1–3 months post-CRT. ALC = absolute lymphocyte count; NLR = neutrophil-to-lymphocyte ratio; AEC = absolute eosinophil count; GTR: gross total resection; V60 = percent brain volume receiving ≥60 Gy; MGMT = O-6-methylguanine-DNA methyltransferase; IDH = isocitrate dehydrogenase; KPS: Karnofsky Performance Status; FLAIR: fluid-attenuated recovery; RT = radiotherapy; PTV = planning target volume.
